# Supplementary material for: Anti-MDA5 antibody as a potential diagnostic and prognostic biomarker in patients with dermatomyositis
Source: PubMed Central journal article supplement (PMC5432278; doi:10.18632/oncotarget.15716), 2017-02-24
Supplement: oncotarget-08-26552-s001.pdf [file oncotarget-08-26552-s001.pdf]

# Anti-MDA5 antibody as a potential diagnostic and prognostic biomarker in patients with dermatomyositis

## Supplementary Materials

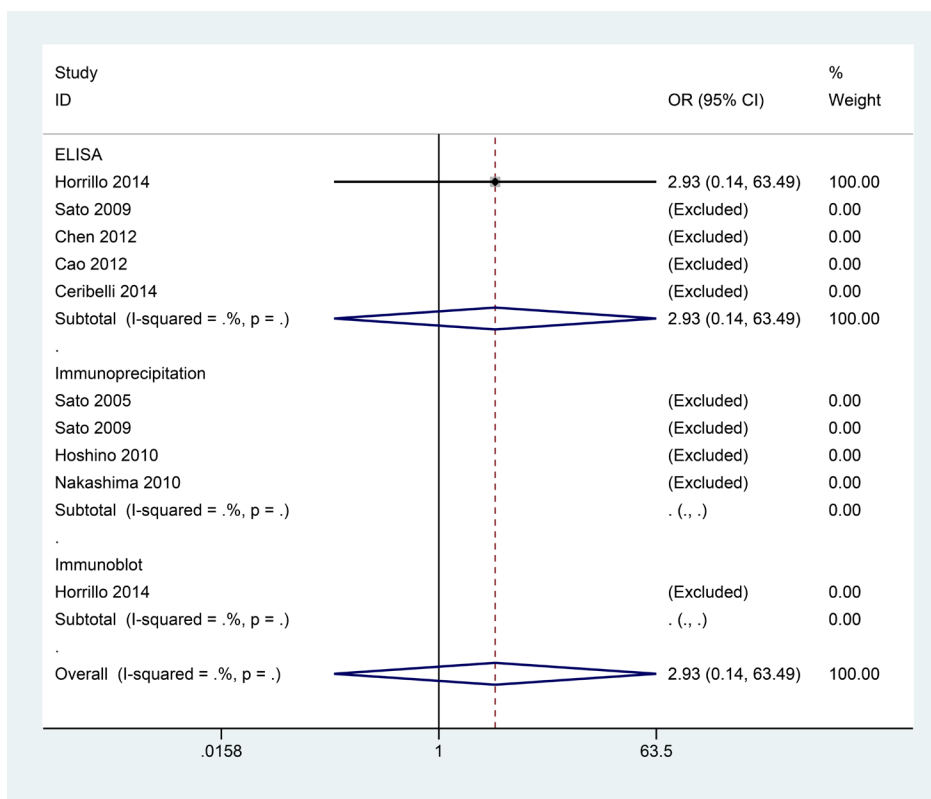

Supplementary Figure 1: Forest plot of the association between anti-MDA5 antibodies and polymyositis (PM).

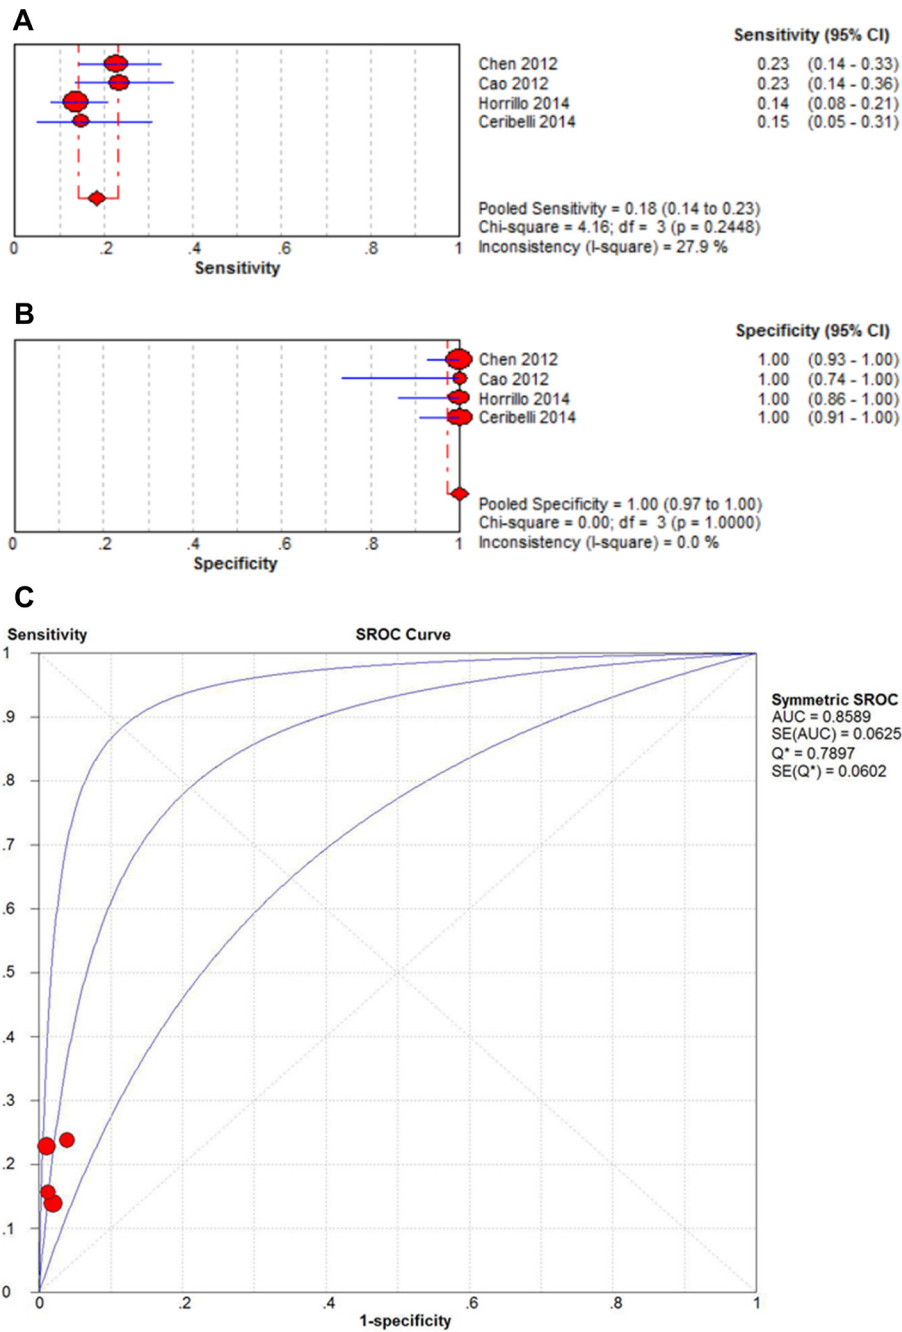

**Supplementary Figure 2:** Forest plots of the pooled estimates of sensitivity (A), specificity (B), and AUC (C) values of anti-MDA5 antibodies detected by ELISA in DM patients.

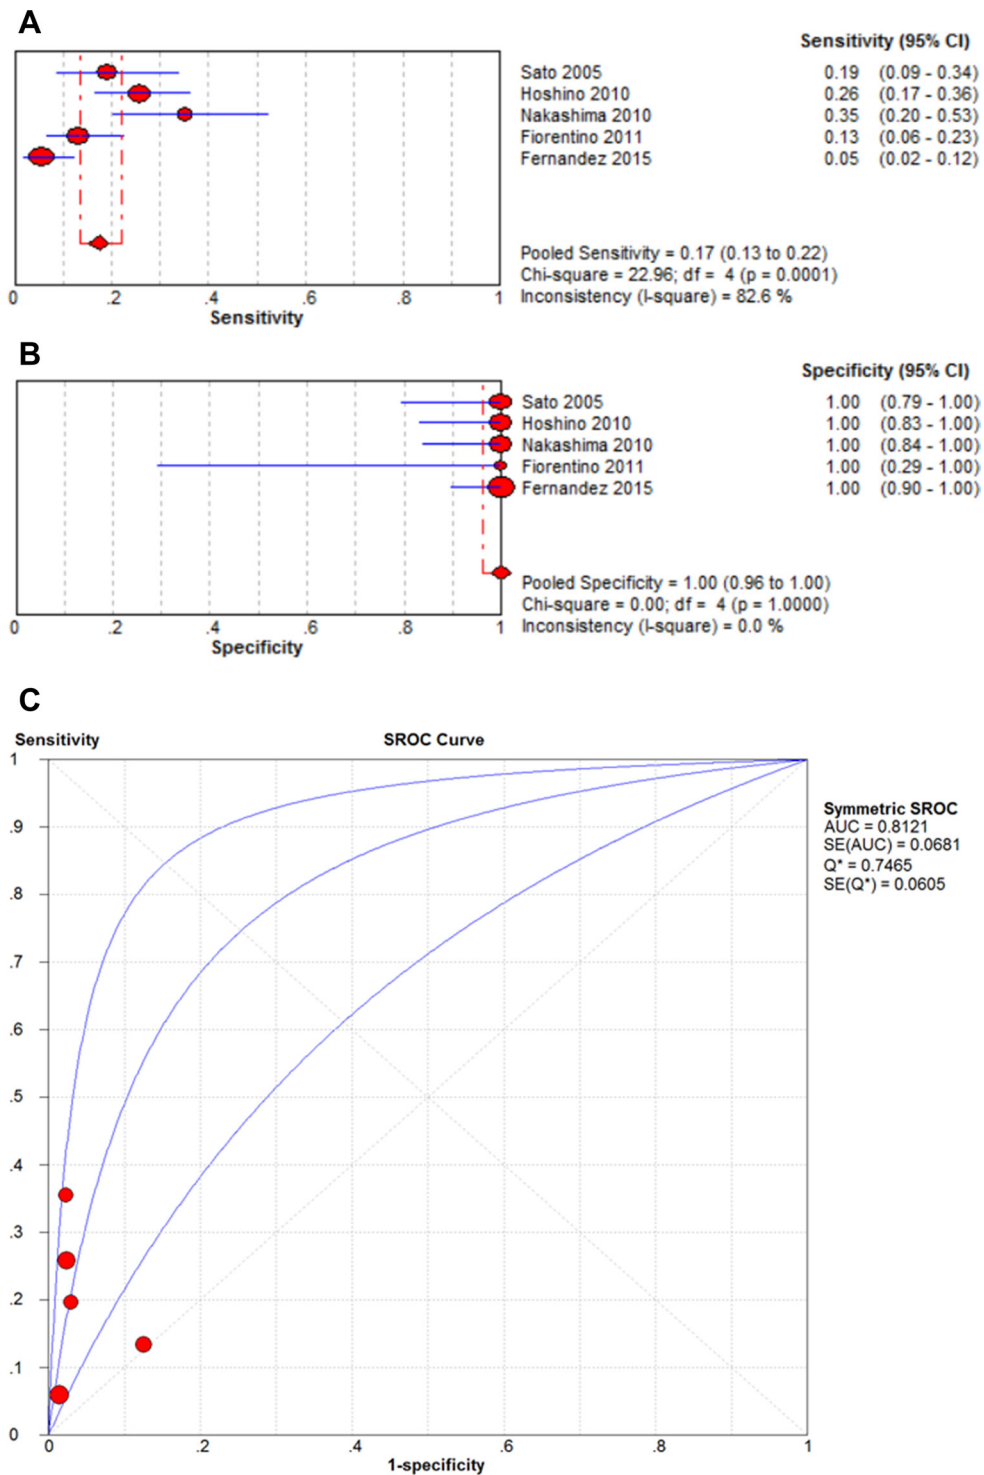

**Supplementary Figure 3:** Forest plots of the pooled estimates of sensitivity (A), specificity (B) and AUC (C) of anti-MDA5 antibodies detected by immunoprecipitation in DM patients.

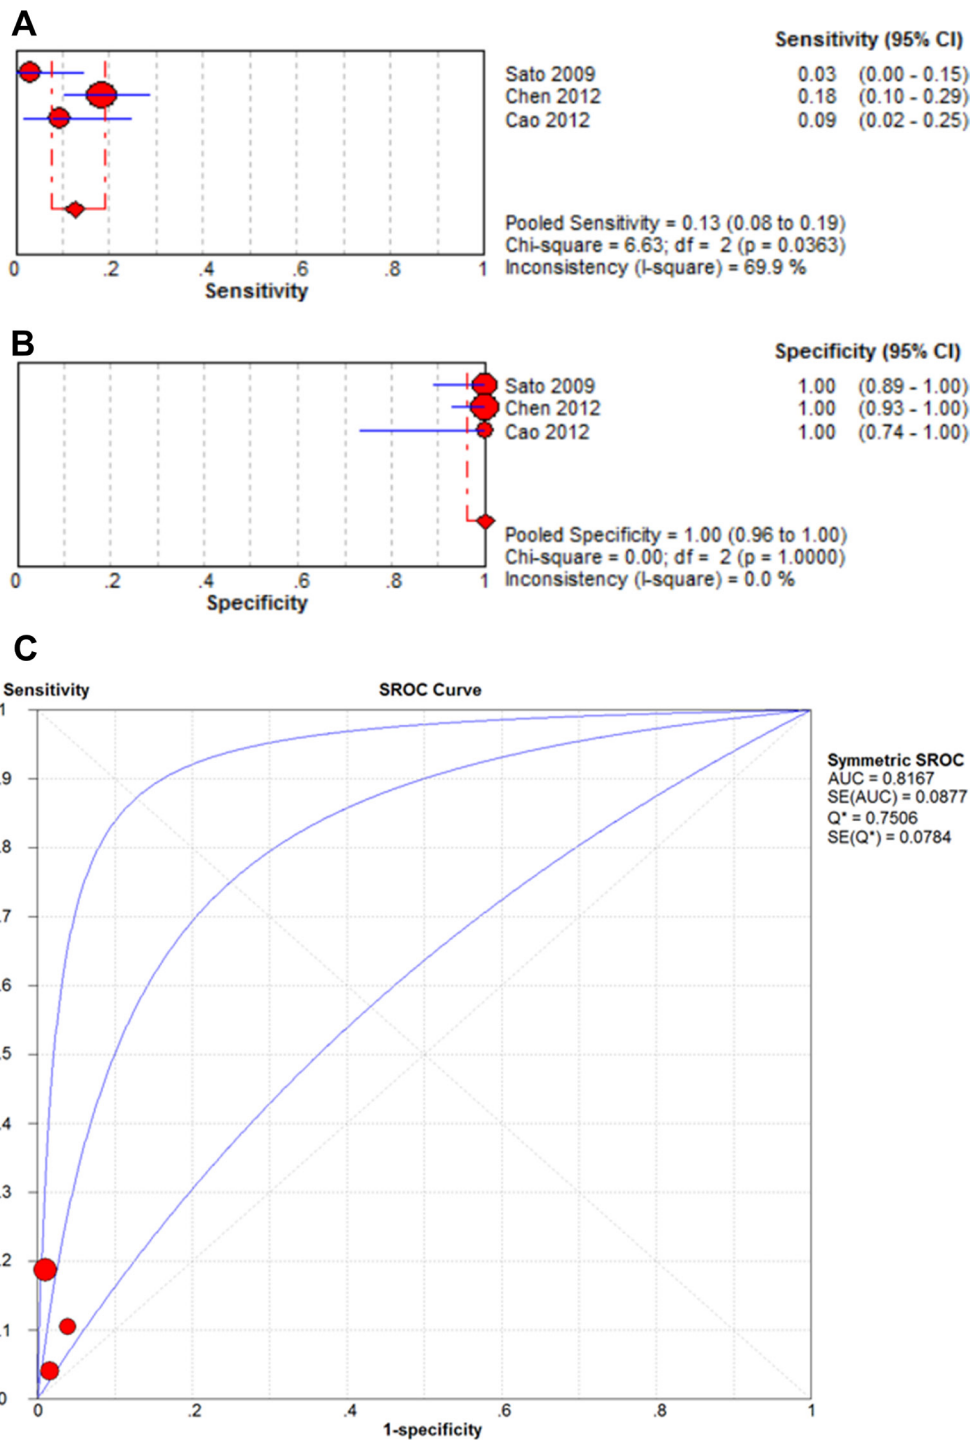

**Supplementary Figure 4:** Forest plots of the pooled estimates of sensitivity (A), specificity (B) and AUC (C) of anti-MDA5 antibodies detected by ELISA in classic DM patients.

**Supplementary Table 1: Basic characteristics of the eligible studies that examined PM, DM, classic DM, and CADM cases.** See Supplementary\_Table\_1

**Supplementary Table 2: Basic characteristics of the eligible studies that examined mortality.** See Supplementary\_Table\_2
